# Supplementary material for: Sub-Atomic Resolution Crystal Structures Reveal Conserved Geometric Outliers at Functional Sites
Source: MDPI journal article supplement (doi:10.3390/molecules24173044), 2019-08-22
Supplement: s1 [file s1]

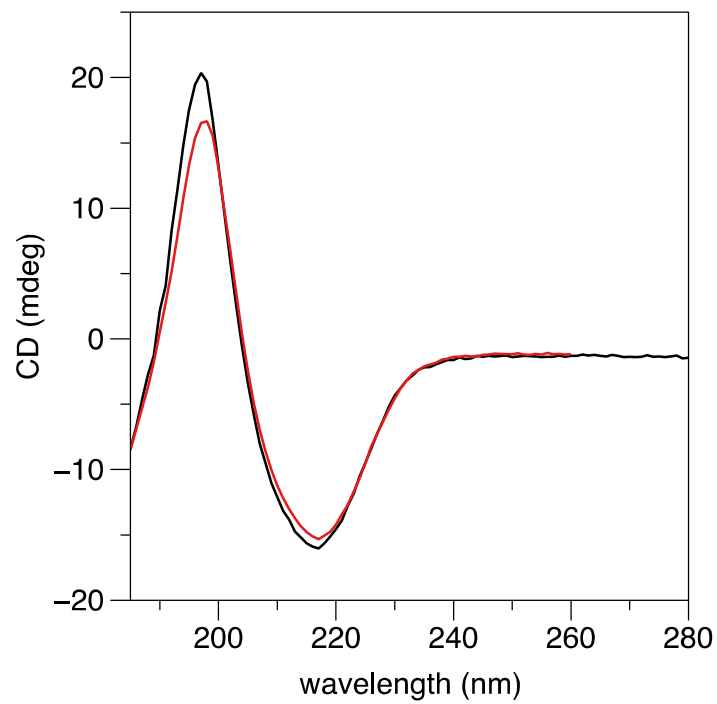

**Supplementary Figure S1. Comparison of CD spectra for d-P2 (black) and h-P2 (red).**

d-P2 0.74 Å

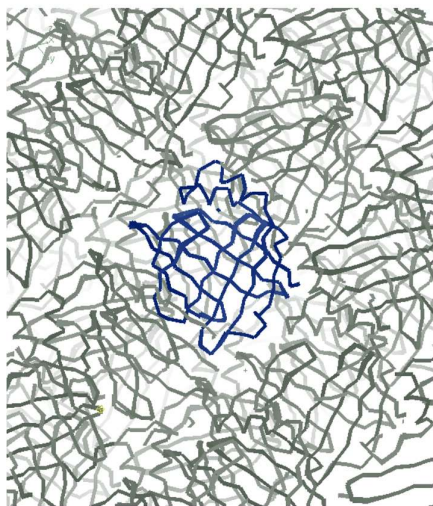

h-P2 0.86 Å

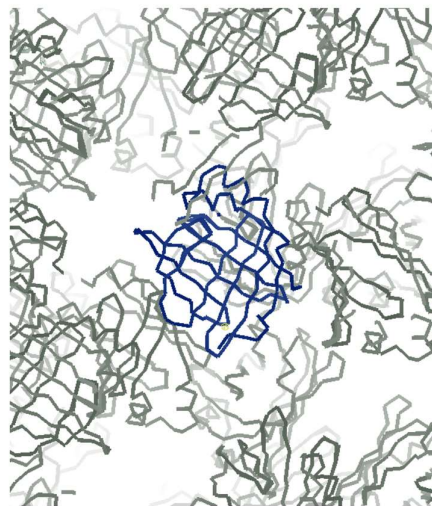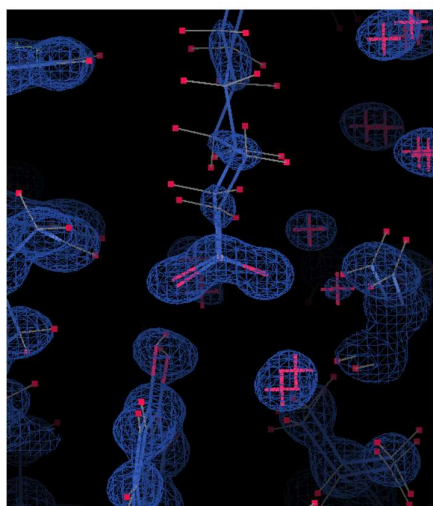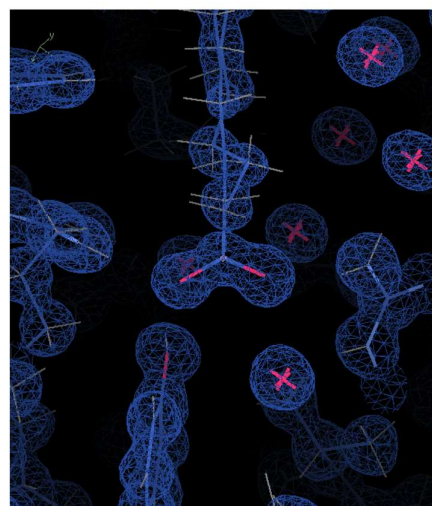

**Supplementary Figure S2. Comparison of crystal packing and disorder.**

Top: crystal packing visualized for the crystal forms of d-P2 and h-P2 indicate much tighter packing for d-P2. The blue molecule representing the asymmetric unit is in the same orientation in both panels.

Bottom: The binding site for the fatty acid ligand is more disordered in d-P2. The map is the final 2F<sub>o</sub>-F<sub>c</sub> map at 1.5  $\sigma$  level.

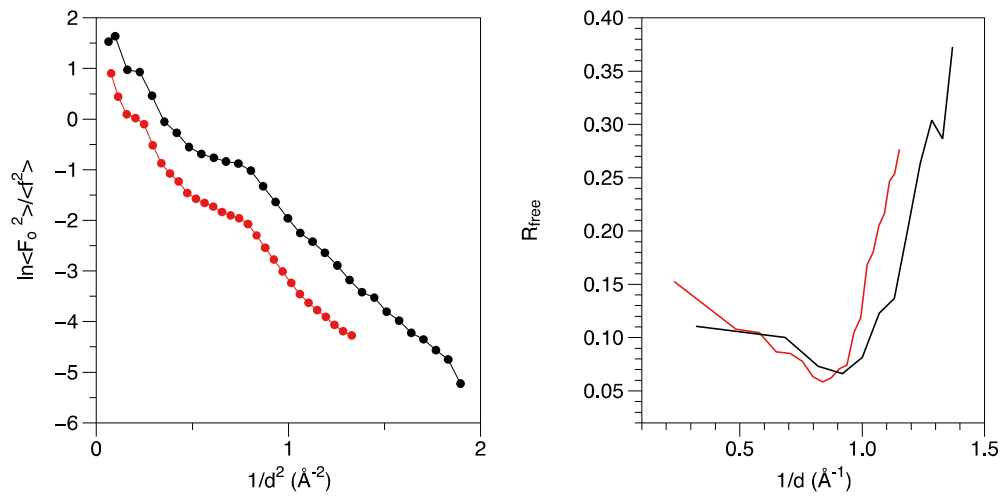

**Supplementary Figure S3. Wilson (left) and Luzzati (right) plots for d-P2 (black) and h-P2 (red).**
